# Supplementary material for: Linking Biogenic High-Temperature Ice Nucleating Particles in Arctic soils and Streams to Their Microbial Producers
Source: Copernicus journal article supplement (doi:10.5194/ar-2024-18), 2024-09-03
Supplement: Supplementary file 1 [file ar-2024-18-supplement.pdf]

## Supporting information:

# Linking Biogenic High-Temperature Ice Nucleating Particles in Arctic soils and Streams to Their Microbial Producers

Lasse Z. Jensen<sup>1,2,3a\*</sup>, Julie K. Simonsen<sup>1,4a</sup>, Ada Pastor<sup>4,7</sup>, Christof Pearce<sup>2,3,6</sup>, Per Nørnberg<sup>1,6†</sup>, Lars

5 Chresten Lund-Hansen<sup>2,4</sup>, Kai Finster<sup>1,2,3,5</sup>, Tina Šantl-Temkiv<sup>1,2,3,5\*</sup>

<sup>1</sup>Department of Biology, Microbiology Section, Aarhus University, Ny Munkegade 116, 8000 Aarhus, Denmark.

<sup>2</sup>Arctic Research Center, Aarhus University, Ny Munkegade 116, 8000

Aarhus, Denmark.

<sup>3</sup>iCLIMATE Aarhus University Interdisciplinary Centre for Climate

10 Change, Frederiksborgvej 399, Roskilde, Denmark.

<sup>4</sup>Department of Biology, Aquatic Biology Section, Aarhus University, 8000 Aarhus C, Denmark.

<sup>5</sup>Stellar Astrophysics Centre, Department of Physics and Astronomy, Aarhus University, Ny Munkegade 120, 8000 Aarhus, Denmark

<sup>6</sup>Department of Geoscience, Aarhus University, 800 Aarhus C, Denmark.

15 <sup>7</sup>Group of Continental Aquatic Ecology Research (GRECO), Institute of Aquatic Ecology, University of Girona, Girona, Spain

\*These authors contributed equally to this study.

†Author deceased

20 *Correspondence to:* Tina Šantl-Temkiv (Temkiv@bio.au.dk) and Lasse Z. Jensen (lassejensen@bio.au.dk)

**Supplementary Table 1** show the amount of soil used for DNA extraction for each sample and if the sample was excluded from the study due to DNA extraction inefficiency. Note that samples which had too little DNA after extraction were excluded from the DNA analysis.

| Stream   | Replicate | Soil (g) | Comments |
|----------|-----------|----------|----------|
| Kærelv C | 1         | 0.22     |          |
| Kærelv C | 2         | 0.25     |          |
| Kærelv A | 1         | 0.28     |          |

|                  |   |      |          |
|------------------|---|------|----------|
| Kærelv A         | 2 | 0.28 |          |
| West 5           | 1 | 0.22 |          |
| West 5           | 2 | 0.26 |          |
| West 4           | 1 | 0.26 |          |
| West 4           | 2 | 0.28 |          |
| Aucella          | 1 | 0.16 | Excluded |
| Aucella          | 2 | 0.15 | Excluded |
| Tørvedammen      | 1 | 0.25 |          |
| Tørvedammen      | 2 | 0.24 |          |
| West 1           | 1 | 0.25 |          |
| West 1           | 2 | 0.26 |          |
| West 3           | 1 | 0.29 |          |
| West 3           | 2 | 0.27 |          |
| West 2           | 1 | 0.29 |          |
| West 2           | 2 | 0.28 |          |
| Grænseelv        | 1 | 0.25 |          |
| Grænseelv        | 2 | 0.29 |          |
| Zackenberg River | 1 | 0.15 |          |
| Zackenberg River | 2 | 0.04 | Excluded |

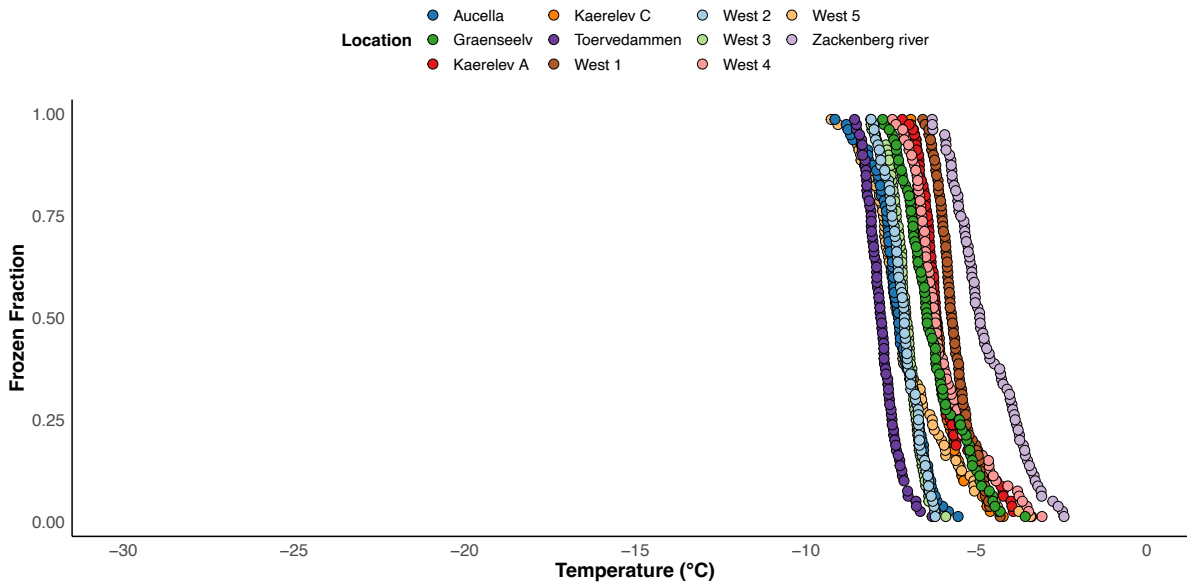

Supplementary Figure 1 Freezing activity for soil samples from eleven different locations in Northeast Greenland given as the fraction of frozen droplets as a function of temperature

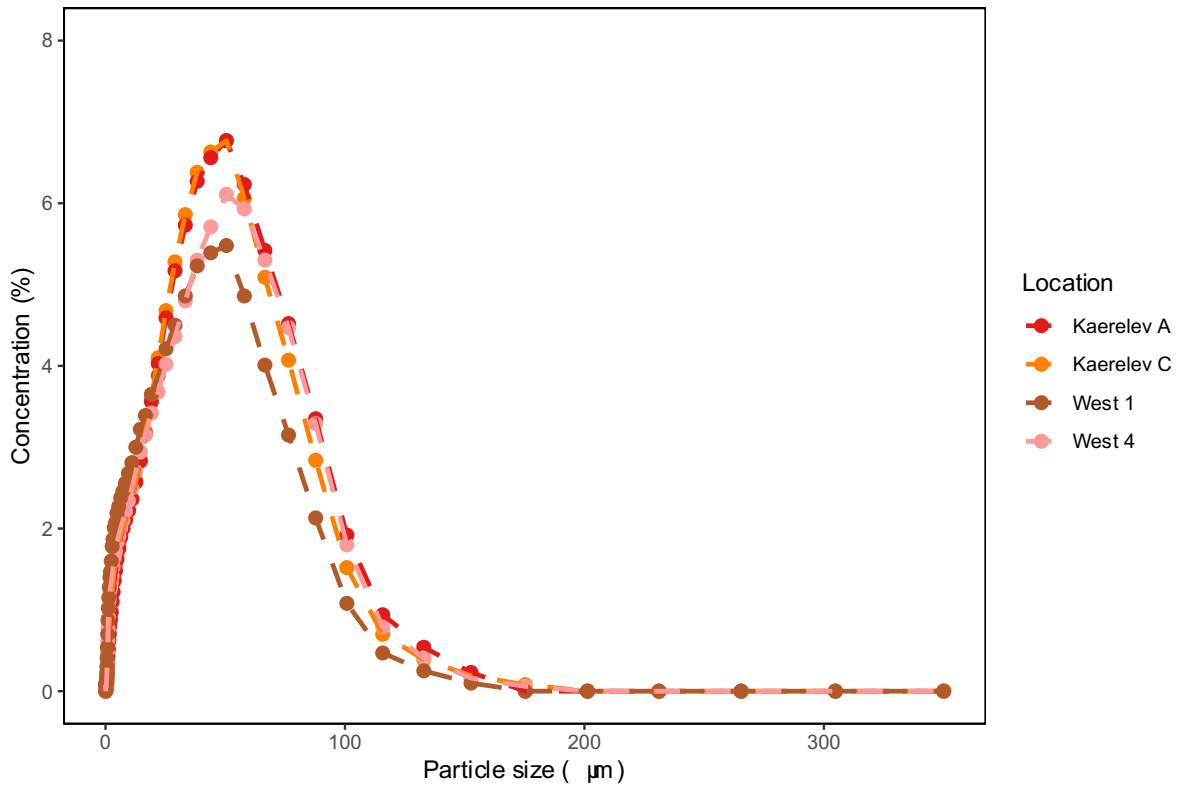

**Supplementary Figure 2** show soil particle size distribution for the 4 samples with a peak mode between 0 and 100  $\mu\text{m}$ . Clay particles are considered as  $< 2 \mu\text{m}$ , Silt 2-63  $\mu\text{m}$ , while Sand  $> 63 \mu\text{m}$ . Note the only 4 samples are depicted here, since too little sample was available for the rest of location to perform the analysis.

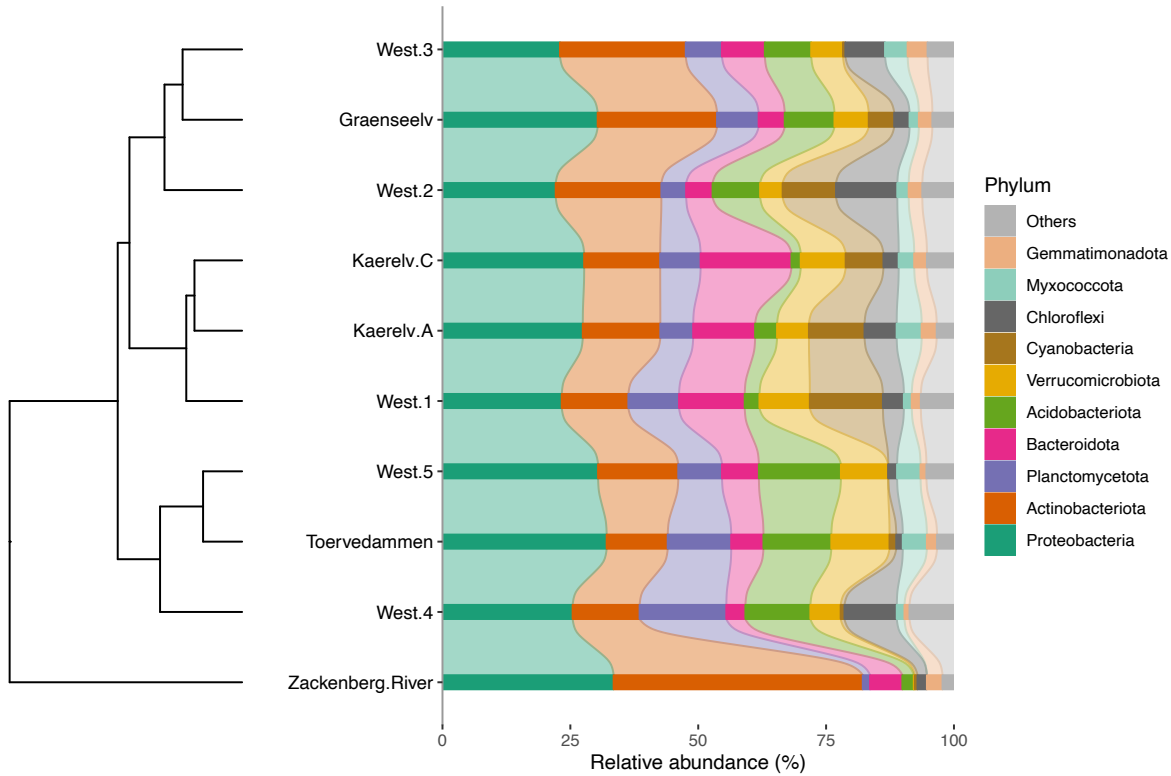

**Supplementary Figure 3** Shows the mean relative abundance of the top 11 highest abundant bacterial phyla present in the soil samples from the 11 different location. Additionally the samples has been clustered based on the euclidean distance matrix.

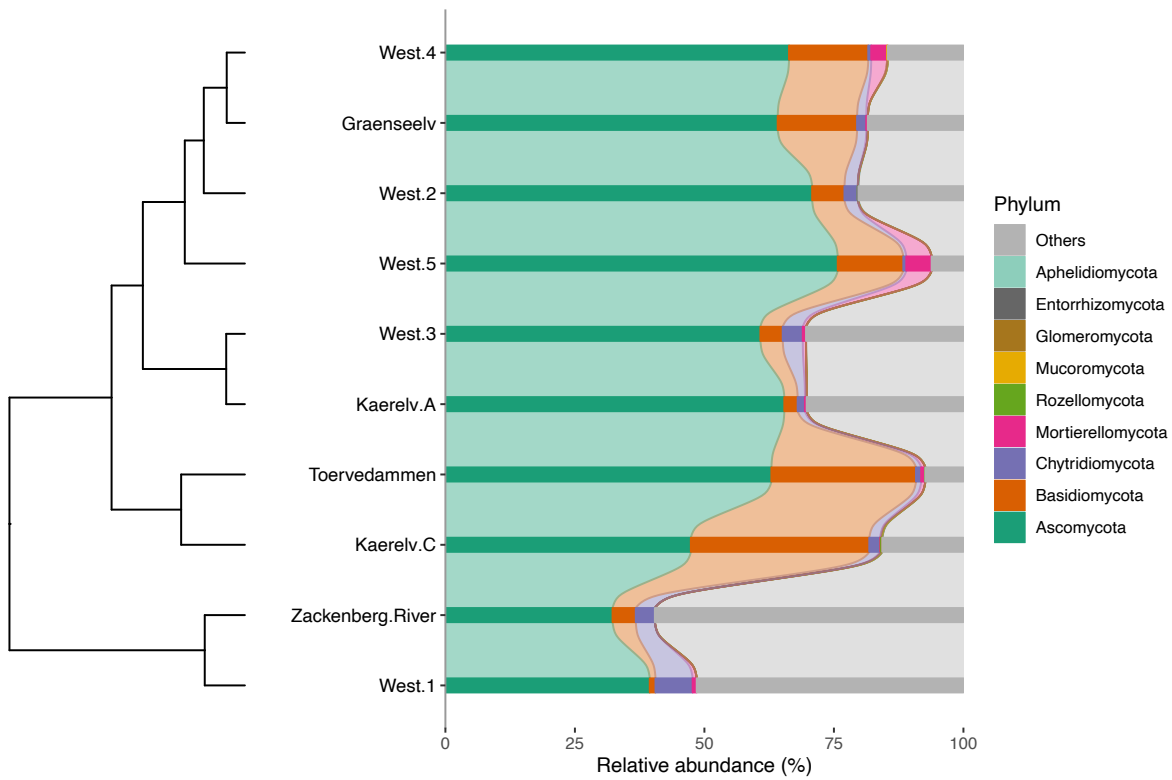

45 **Supplementary Figure 4** Shows the mean relative abundance of the top 10 highest abundant fungal phyla present in the soil samples from the 11 different location. Additionally the samples has been clustered based on the euclidean distance matrix.

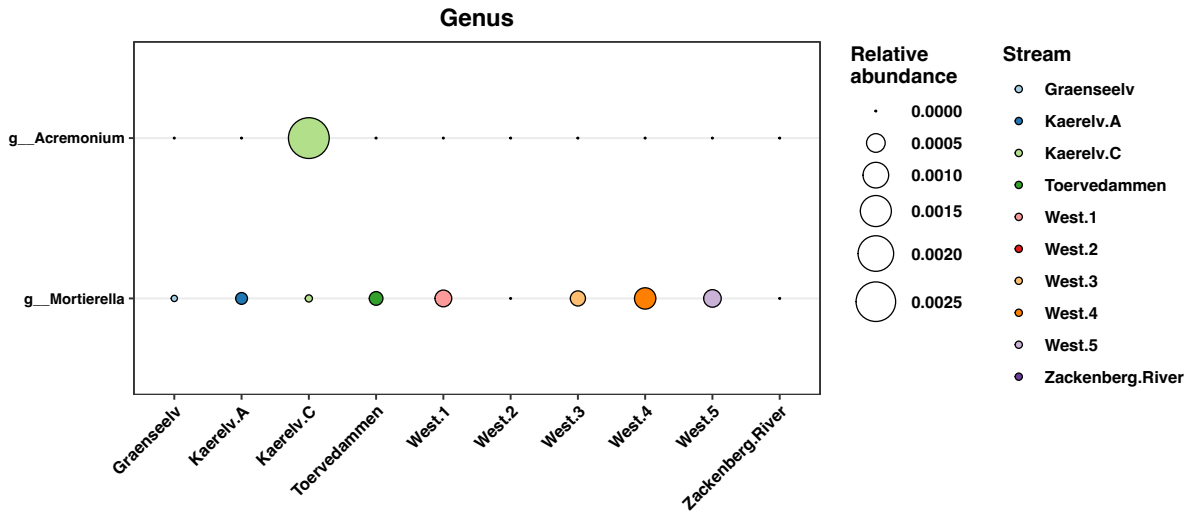

50 **Supplementary Figure 5** shows the mean relative abundance of known fungal INA genera at all 11 locations.



### Trophic mode

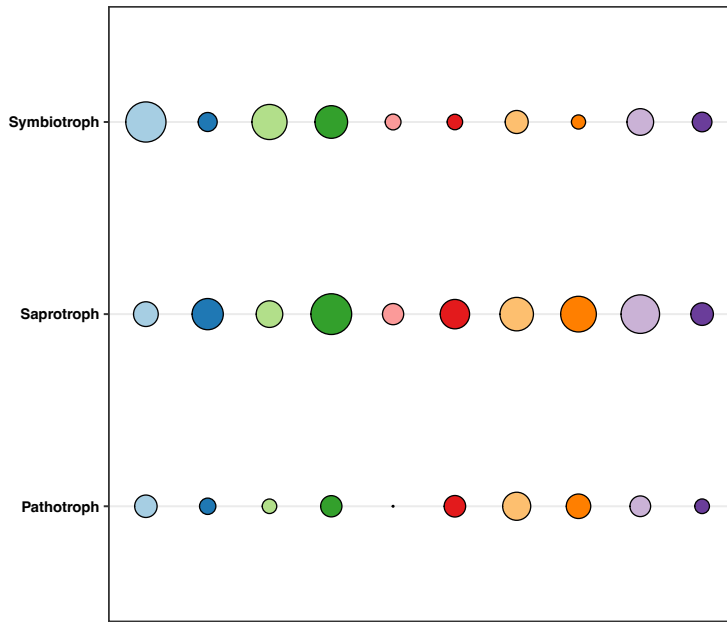

Relative abundance

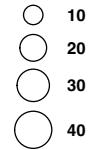

Stream

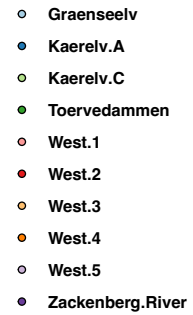

### Guild

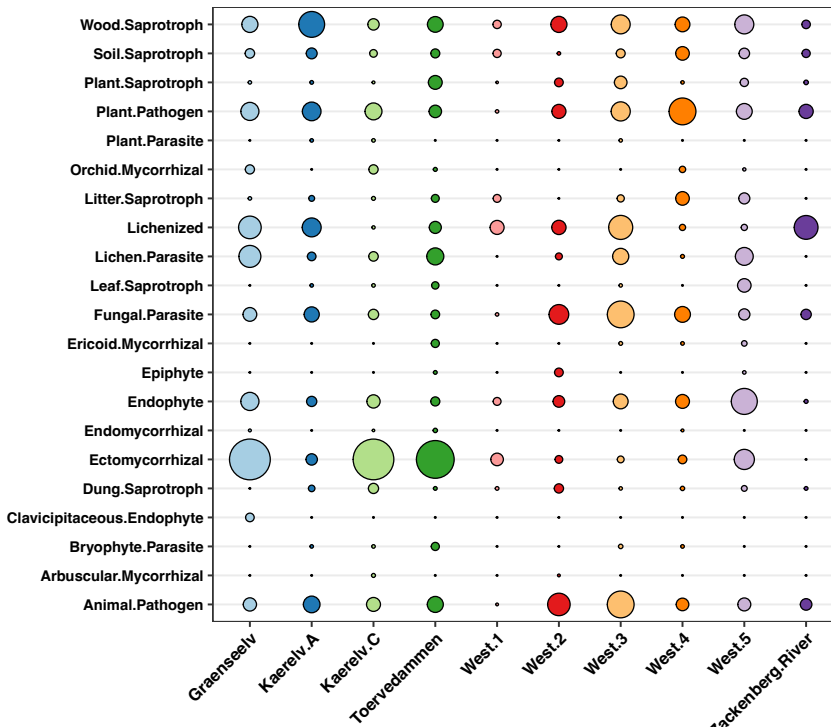

Supplementary Figure 6 provides an overview of the mean relative abundance of predicted fungal trophic modes and guilds across all 11 sampled locations. The predictions were generated using FUNguild, a tool commonly employed for assessing fungal functional roles in environmental samples. In this context, trophic modes refer to the nutritional strategies adopted by fungi, such as saprotrophy, pathotrophy, or symbiotrophy. Additionally, guilds categorize fungi based on shared ecological functions.

60

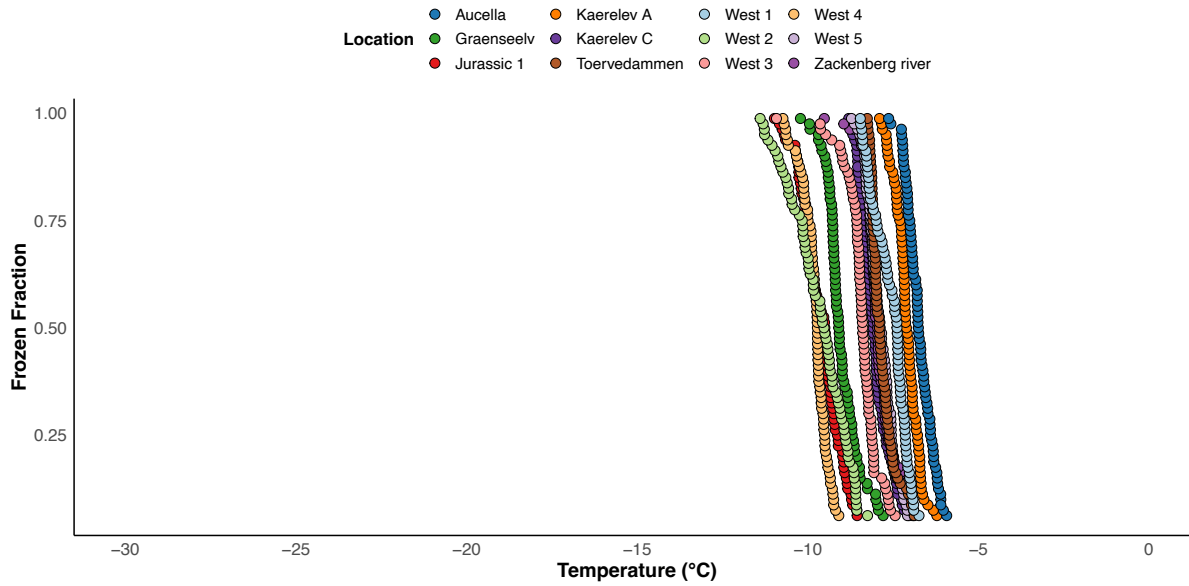

Supplementary Figure 7 Freezing activity for freshwater samples from twelve different locations in Northeast Greenland given as fraction of frozen droplets as a function of temperature.



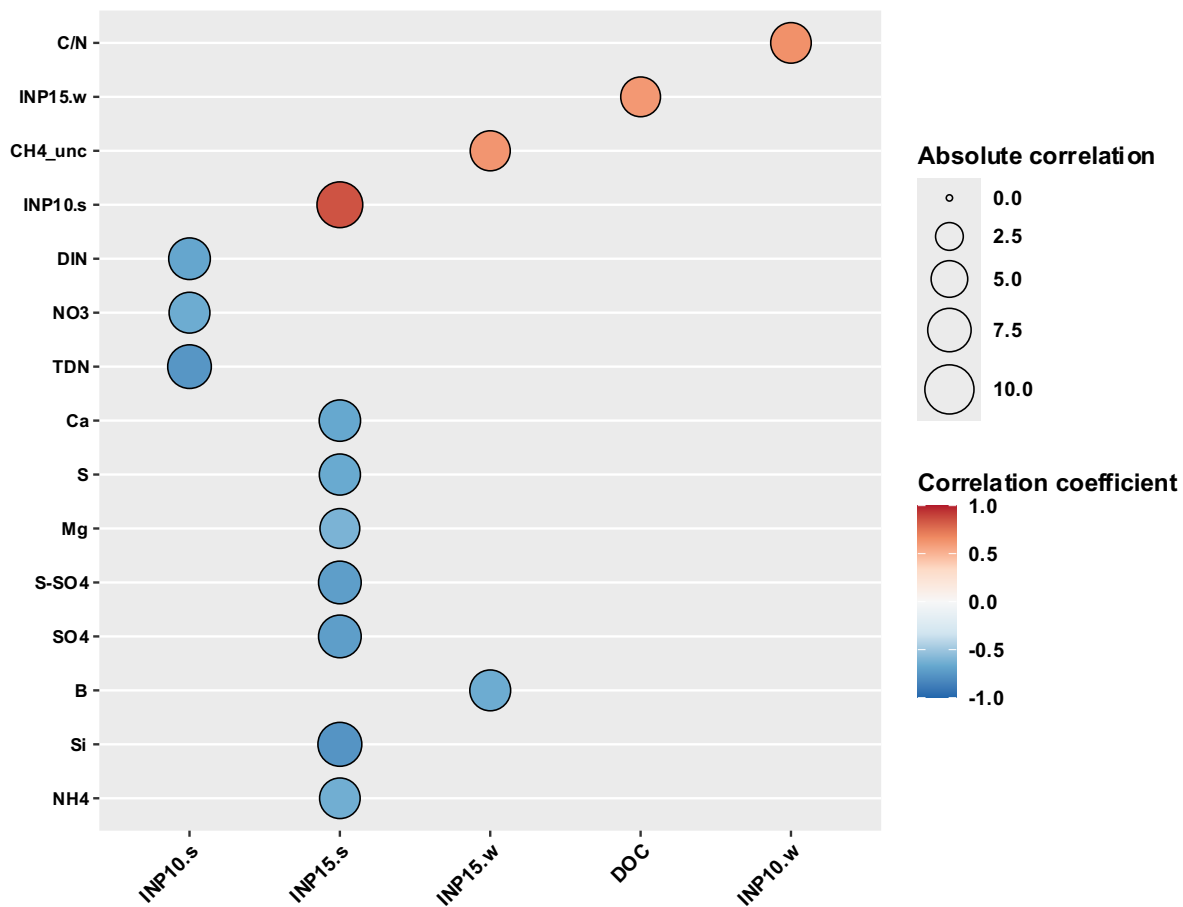

65

**Supplementary Figure 8** show significant Spearman's rank correlations ( $p < 0.05$ ) between ice nucleating particle concentrations in soil and streams with biogeochemical parameters. The size of the bubbles represents the strength of the absolute correlation, while the color indicates whether the correlation is positive (red) or negative (blue).

70
